# Supplementary material for: Therapeutic PD-L1 antibodies are more effective than PD-1 antibodies in blocking PD-1/PD-L1 signaling
Source: PubMed Central journal article supplement (PMC6685986; doi:10.1038/s41598-019-47910-1), 2019-08-07
Supplement: 41598_2019_47910_MOESM1_ESM.pdf [file 41598_2019_47910_MOESM1_ESM.pdf]

## **Therapeutic PD-L1 antibodies are more effective than PD-1 antibodies in blocking PD-1/PD-L1 signaling**

Annika De Sousa Linhares<sup>1§</sup>, Claire Battin<sup>1§</sup>, Sabrina Jutz<sup>1</sup>, Judith Leitner<sup>1</sup>, Christine Hafner<sup>3,4</sup>, Joshua Tobias<sup>5</sup>, Ursula Wiedermann<sup>5</sup>, Michael Kundi<sup>6</sup>, Gerhard J. Zlabinger<sup>2</sup>, Katharina Grabmeier-Pfistershammer<sup>2</sup> and Peter Steinberger<sup>1\*</sup>.

<sup>1</sup>Division of Immune Receptors and T Cell Activation, Center for Pathophysiology, Infectiology, Medical University of Vienna, Vienna, Austria

<sup>2</sup>Division of Clinical and Experimental Immunology, Center for Pathophysiology, Infectiology, and Immunology, Institute of Immunology, Medical University of Vienna, Vienna, Austria

<sup>3</sup>Department of Dermatology, University Hospital St. Pölten, Karl Landsteiner University of Health Sciences, St. Pölten, Austria

<sup>4</sup>Karl Landsteiner Institute of Dermatological Research, Karl Landsteiner Gesellschaft, St. Pölten, Austria

<sup>5</sup>Institute of Specific Prophylaxis and Tropical Medicine, Center for Pathophysiology, Infectiology, and Immunology, Medical University of Vienna, Vienna, Austria

<sup>6</sup>Institute of Environmental Health, Center for Public Health, Medical University of Vienna, Vienna, Austria

<sup>§</sup>These authors contributed equally and share first authorship

\*Address correspondence to Peter Steinberger, Division of Immune Receptors and T Cell Activation, Center for Pathophysiology, Infectiology, Medical University of Vienna, Lazarettgasse 19, 1090 Vienna, Austria. Phone ++43-1-40160-33241; E-mail: [peter.steinberger@meduniwien.ac.at](mailto:peter.steinberger@meduniwien.ac.at)

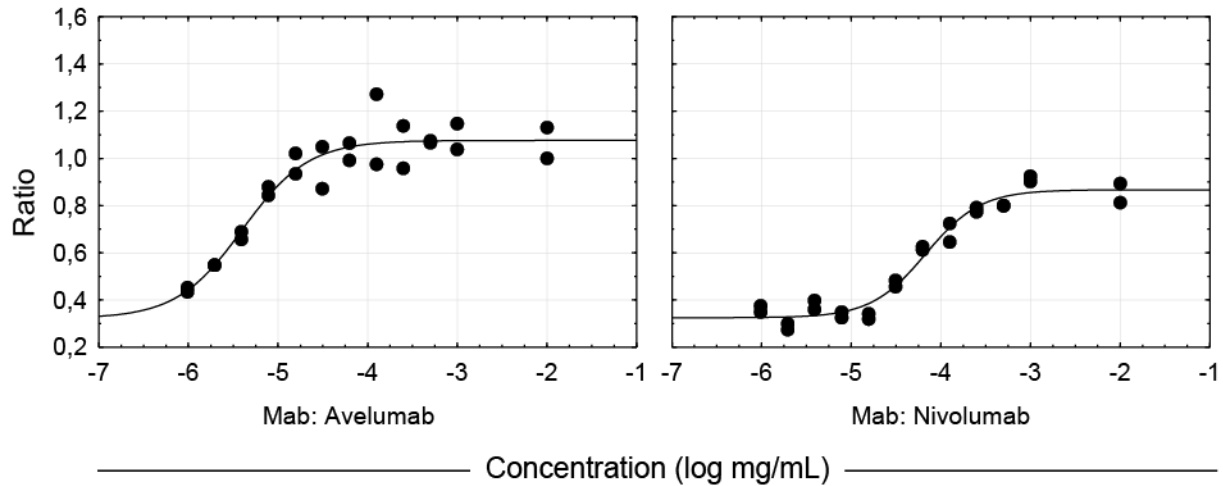

|                  | EC50 (ng/ml) | 95% CI      |
|------------------|--------------|-------------|
| <b>Avelumab</b>  | 4.01         | 1.50-10.76  |
| <b>Nivolumab</b> | 67.92        | 51.47-89.64 |

|                  | Avelumab | Nivolumab |
|------------------|----------|-----------|
| <b>Avelumab</b>  | -        | <0.001    |
| <b>Nivolumab</b> | <0.001   | -         |

Supplemental Figure 1:

Determination of functional EC<sub>50</sub> values for avelumab and nivolumab using T cell stimulator cells based on the human myelogenous leukemia cell line K562 (K-TCS). K-TCS were generated by expressing a membrane-bound anti-CD3 construct in K562 cells, which do not express CD80 or CD86. PD-1 expressing reporter cells were stimulated with K-TCS or K-TCS-PD-L1 for 24 hours in presence of PD-L1 antibody avelumab or PD-1 antibody nivolumab used in final concentrations ranging from 1000 to 0.98 ng/ml. Inhibition curves and half maximum effective concentrations (EC<sub>50</sub>) were calculated from normalized data and statistical analysis was performed as described in the material and methods section. Data are representative for three independently performed experiments.
